# Supplementary material
Source: ML conference proceedings conference paper supplement (https://proceedings.mlr.press/v37/chena15.html)
Supplement: Supplementary file 1 [file chena15-supp.pdf]

# Spectral MLE: Top- $K$ Rank Aggregation from Pairwise Comparisons

## — Supplemental Materials —

Yuxin Chen\*      Changho Suh†

### Abstract

This supplemental document presents details concerning analytical derivations that support the theorems made in the main text “Spectral MLE: Top- $K$  Rank Aggregation from Pairwise Comparisons”, accepted to the 32th International Conference on Machine Learning (ICML 2015). One can find here the detailed proof of Theorems 2 - 4.

## 1 Main Theorems

We repeat the main theorems as follows for convenience of presentation.

**Theorem 2 (Minimax Lower Bounds).** Fix  $\epsilon \in (0, \frac{1}{2})$ , and let  $\mathcal{G} \sim \mathcal{G}_{n, p_{\text{obs}}}$ . If

$$L \leq c \frac{(1 - \epsilon) \log n - 2}{np_{\text{obs}} \Delta_K^2} \tag{1}$$

holds for some absolute constant<sup>1</sup>  $c > 0$ , then for any ranking scheme  $\psi$ , there exists a preference vector  $\mathbf{w}$  with separation  $\Delta_K$  such that the probability of error  $P_e(\psi) \geq \epsilon$ .

**Theorem 3.** Let  $c_0, c_1, c_2, c_3 > 0$  be some sufficiently large constants. Suppose that  $L = O(\text{poly}(n))$ , the comparison graph  $\mathcal{G} \sim \mathcal{G}_{n, p_{\text{obs}}}$  with  $p_{\text{obs}} > c_0 \log n/n$ , and assume that the separation measure satisfies

$$\Delta_K > c_1 \sqrt{\frac{\log n}{np_{\text{obs}} L}}. \tag{2}$$

Then with probability exceeding  $1 - 1/n^2$ , Spectral MLE perfectly identifies the set of top- $K$  ranked items, provided that the parameters obey  $T \geq c_2 \log n$  and

$$\xi_t := c_3 \left\{ \xi_{\min} + \frac{1}{2t} (\xi_{\max} - \xi_{\min}) \right\}, \tag{3}$$

where  $\xi_{\min} := \sqrt{\frac{\log n}{nLp_{\text{obs}}}}$  and  $\xi_{\max} := \sqrt{\frac{\log n}{p_{\text{obs}} L}}$ .

**Theorem 4.** Suppose that  $\mathcal{G} \sim \mathcal{G}_{n, p_{\text{obs}}}$  with  $p_{\text{obs}} > c_1 \log n/n$  for some large constant  $c_1$ , and that there exists a score  $\hat{\mathbf{w}}^{\text{ub}} \in [w_{\min}, w_{\max}]^n$  independent of  $\mathcal{G}$  satisfying

$$|\hat{w}_i^{\text{ub}} - w_i| \leq \xi w_{\max}, \quad \forall 1 \leq i \leq n; \tag{4}$$

$$\|\hat{\mathbf{w}}^{\text{ub}} - \mathbf{w}\| \leq \delta \|\mathbf{w}\|. \tag{5}$$

---

\*Department of Statistics, Stanford University, CA 94305, U.S.A.

†Department of Electrical Engineering, Korea Advanced Institute of Science and Technology, Daejeon 305-701, Korea

<sup>1</sup>More precisely,  $c = w_{\min}^4 / (2w_{\max}^4)$ .

Then with probability at least  $1 - c_2 n^{-4}$  for some constant  $c_2 > 0$ , the coordinate-wise MLE

$$w_i^{\text{mle}} := \arg \max_{\tau \in [w_{\min}, w_{\max}]} \mathcal{L}(\tau, \hat{\mathbf{w}}_{\setminus i}; \mathbf{y}_i) \quad (6)$$

satisfies

$$|w_i - w_i^{\text{mle}}| < \frac{20 \left(6 + \frac{\log L}{\log n}\right) w_{\max}^5}{w_{\min}^4} \max \left\{ \delta + \frac{\xi \log n}{np_{\text{obs}}}, \sqrt{\frac{\log n}{np_{\text{obs}} L}} \right\} \quad (7)$$

simultaneously for all scores  $\hat{\mathbf{w}} \in [w_{\min}, w_{\max}]^n$  obeying

$$|\hat{w}_i - w_i| \leq |\hat{w}_i^{\text{ub}} - w_i|, \quad 1 \leq i \leq n. \quad (8)$$

## 2 Performance Guarantees of Spectral MLE

In this section, we establish the theoretical guarantees of Spectral MLE in controlling the ranking accuracy and  $\ell_\infty$  estimation errors, which are the subjects of Theorem 3 and Theorem 4. The proof of Theorem 3 relies heavily on the claim of Theorem 4; for this reason, we present the proofs of Theorem 3 and Theorem 4 in a reverse order. Before proceeding, we recall that the coordinate-wise log-likelihood of  $\tau$  is given by

$$\frac{1}{L} \log \mathcal{L}(\tau, \hat{\mathbf{w}}_{\setminus i}; \mathbf{y}_i) := \sum_{j: (i,j) \in \mathcal{E}} y_{ij} \log \frac{\tau}{\tau + \hat{w}_j} + (1 - y_{ij}) \log \frac{\hat{w}_j}{\tau + \hat{w}_j}, \quad (9)$$

and we shall use  $\mathbf{w}_{\setminus i}$  (resp.  $\hat{\mathbf{w}}_{\setminus i}$ ) to denote the vector  $\mathbf{w} = [w_1, \dots, w_n]$  (resp.  $\hat{\mathbf{w}} = [\hat{w}_1, \dots, \hat{w}_n]$ ) excluding the entry  $w_i$  (resp.  $\hat{w}_i$ ).

### 2.1 Proof of Theorem 4

To prove Theorem 4, we aim to demonstrate that for every  $\tau \in [w_{\min}, w_{\max}]$  that is sufficiently separated from the ground truth  $w_i$  (or, more formally,  $|\tau - w_i| \gtrsim \max \left\{ \delta + \frac{\xi \log n}{np_{\text{obs}}}, \sqrt{\frac{\log n}{np_{\text{obs}} L}} \right\}$ ), the coordinate-wise likelihood satisfies

$$\log \mathcal{L}(w_i, \hat{\mathbf{w}}_{\setminus i}; \mathbf{y}_i) > \log \mathcal{L}(\tau, \hat{\mathbf{w}}_{\setminus i}; \mathbf{y}_i) \quad (10)$$

and, therefore,  $\tau$  cannot be the coordinate-wise MLE.

To begin with, we provide a lemma (which will be proved later) that concerns (10) for *any single*  $\tau$  that is well separated from  $w_i$ .

**Lemma 1.** *Fix any  $\gamma \geq 3$ . Under the conditions of Theorem 4, for any  $\tau \in [w_{\min}, w_{\max}]$  obeying*

$$|w_i - \tau| > \gamma \cdot \frac{w_{\max}^5}{w_{\min}^4} \max \left\{ \frac{25}{4} \left( \delta + \frac{\xi \log n}{np_{\text{obs}}} \right), 20 \sqrt{\frac{\log n}{np_{\text{obs}} L}} \right\}, \quad (11)$$

one has

$$\frac{1}{L} \log \mathcal{L}(w_i, \hat{\mathbf{w}}_{\setminus i}; \mathbf{y}_i) - \frac{1}{L} \log \mathcal{L}(\tau, \hat{\mathbf{w}}_{\setminus i}; \mathbf{y}_i) > \frac{w_{\max}^6}{100 w_{\min}^6} \frac{\log n}{L}. \quad (12)$$

with probability exceeding  $1 - 4n^{-\gamma} - 2n^{-10}$ ; this holds simultaneously for all  $\hat{\mathbf{w}}_i \in [w_{\min}, w_{\max}]^n$  satisfying (8).

To establish Theorem 4, we still need to derive a uniform control over all  $\tau$  satisfying (11). This will be accomplished via a standard covering argument. Specifically, for any small quantity  $\epsilon > 0$ , we construct a set  $\mathcal{N}_\epsilon$  (called an  $\epsilon$ -cover) within the interval  $[w_{\min}, w_{\max}]$  such that for any  $\tau \in [w_{\min}, w_{\max}]$ , there exists an  $\tau_0 \in \mathcal{N}_\epsilon$  obeying

$$|\tau - \tau_0| \leq \epsilon \quad \text{and} \quad |\tau_0 - w_i| \geq |\tau - w_i|. \quad (13)$$

It is self-evident that one can produce such a cover  $\mathcal{N}_\epsilon$  with cardinality  $\lceil \frac{w_{\max}}{\epsilon} \rceil + 1$ . If we set  $\gamma = 6 + \frac{\log L}{\log n}$  in Lemma 1, taking the union bound over  $\mathcal{N}_\epsilon$  gives

$$\frac{1}{L} \log \mathcal{L}(w_i, \hat{w}_{\setminus i}; \mathbf{y}_i) - \frac{1}{L} \log \mathcal{L}(\tau_0, \hat{w}_{\setminus i}; \mathbf{y}_i) > \frac{w_{\max}^6}{100w_{\min}^6} \frac{\log n}{L} \quad (14)$$

simultaneously over all  $\tau_0 \in \mathcal{N}_\epsilon$  obeying  $|w_i - \tau_0| > \frac{(6 + \frac{\log L}{\log n}) w_{\max}^5}{w_{\min}^4} \max \left\{ \frac{25}{4} \left( \delta + \frac{\xi \log n}{np_{\text{obs}}} \right), 20 \sqrt{\frac{\log n}{np_{\text{obs}} L}} \right\}$ ; this occurs with probability at least  $1 - 4 |\mathcal{N}_\epsilon| n^{-6 - \frac{\log L}{\log n}} - 8 |\mathcal{N}_\epsilon| n^{-10}$ .

We then proceed by bounding the difference between  $\log \mathcal{L}(\tau, \hat{w}_{\setminus i}; \mathbf{y}_i)$  and  $\log \mathcal{L}(\tau_0, \hat{w}_{\setminus i}; \mathbf{y}_i)$ . To achieve this, we first recognize that the Lipschitz constant of  $\frac{1}{L} \log \mathcal{L}(\tau, \hat{w}_{\setminus i}; \mathbf{y}_i)$  (cf. (9)) is bounded above by

$$\begin{aligned} \frac{1}{L} \cdot \left| \frac{\partial \log \mathcal{L}(\tau, \hat{w}_{\setminus i}; \mathbf{y}_i)}{\partial \tau} \right| &= \left| \sum_{j: (i,j) \in \mathcal{E}} y_{i,j} \left( \frac{1}{\tau} - \frac{1}{\tau + \hat{w}_j} \right) - (1 - y_{i,j}) \frac{1}{\tau + \hat{w}_j} \right| \\ &\stackrel{(a)}{\leq} \deg(i) \cdot \frac{2}{w_{\min}} \stackrel{(b)}{\leq} \frac{12 np_{\text{obs}}}{5 w_{\min}}. \end{aligned}$$

where (a) follows since

$$\left| y_{i,j} \left( \frac{1}{\tau} - \frac{1}{\tau + \hat{w}_j} \right) - (1 - y_{i,j}) \frac{1}{\tau + \hat{w}_j} \right| = \left| \frac{y_{i,j}}{\tau} - \frac{1}{\tau + \hat{w}_j} \right| \leq \left| \frac{y_{i,j}}{\tau} \right| + \left| \frac{1}{\tau + \hat{w}_j} \right| < \frac{2}{w_{\min}},$$

and (b) holds since  $\deg(i) \leq 2.4 np_{\text{obs}}$  with probability  $1 - O(n^{-4})$  as long as  $p_{\text{obs}} > \frac{c_1 \log n}{n}$  for some sufficiently large  $c_1 > 0$ . As a result, by picking

$$\epsilon = \frac{\frac{w_{\max}^6}{100w_{\min}^6} \frac{\log n}{L}}{\frac{12 np_{\text{obs}}}{5 w_{\min}}} = \frac{w_{\max}^6}{240w_{\min}^5} \frac{\log n}{np_{\text{obs}} L}, \quad (15)$$

one can make sure that for any  $|\tau - \tau_0| \leq \epsilon$ ,

$$\frac{1}{L} \log \mathcal{L}(\tau, \hat{w}_{\setminus i}; \mathbf{y}_i) - \frac{1}{L} \log \mathcal{L}(\tau_0, \hat{w}_{\setminus i}; \mathbf{y}_i) \leq \epsilon \cdot \frac{12 np_{\text{obs}}}{5 w_{\min}}, \quad (16)$$

$$\Rightarrow \frac{1}{L} \log \mathcal{L}(\tau, \hat{w}_{\setminus i}; \mathbf{y}_i) < \frac{1}{L} \log \mathcal{L}(\tau_0, \hat{w}_{\setminus i}; \mathbf{y}_i) + \frac{w_{\max}^6}{100w_{\min}^6} \frac{\log n}{L}. \quad (17)$$

In addition, with the above choice (15) of  $\epsilon$  in place, the cardinality of the  $\epsilon$ -cover is bounded above by

$$|\mathcal{N}_\epsilon| \leq \left\lceil \frac{w_{\max}}{\epsilon} \right\rceil + 1 = \left\lceil \frac{240 np_{\text{obs}} L}{\log n} \cdot \frac{w_{\min}^5}{w_{\max}^5} \right\rceil + 1 \ll n^2 L$$

for any sufficiently large  $n$ .

Putting (14) and (17) together suggests that for *all*  $\tau \in [w_{\min}, w_{\max}]$  sufficiently apart from the ground truth  $w_i$ , namely,

$$\forall \tau \in [w_{\min}, w_{\max}]: \quad |\tau - w_i| \geq \frac{(6 + \frac{\log L}{\log n}) w_{\max}^5}{w_{\min}^4} \max \left\{ \frac{25}{4} \left( \delta + \frac{\xi \log n}{np_{\text{obs}}} \right), 20 \sqrt{\frac{\log n}{np_{\text{obs}} L}} \right\}, \quad (18)$$

one necessarily has

$$\begin{aligned} &\frac{1}{L} \log \mathcal{L}(w_i, \hat{w}_{\setminus i}; \mathbf{y}_i) - \frac{1}{L} \log \mathcal{L}(\tau, \hat{w}_{\setminus i}; \mathbf{y}_i) \\ &= \left\{ \frac{1}{L} \log \mathcal{L}(w_i, \hat{w}_{\setminus i}; \mathbf{y}_i) - \frac{1}{L} \log \mathcal{L}(\tau_0, \hat{w}_{\setminus i}; \mathbf{y}_i) \right\} + \left\{ \frac{1}{L} \log \mathcal{L}(\tau_0, \hat{w}_{\setminus i}; \mathbf{y}_i) - \frac{1}{L} \log \mathcal{L}(\tau, \hat{w}_{\setminus i}; \mathbf{y}_i) \right\} \\ &> 0, \end{aligned} \quad (19)$$

with probability at least  $1 - 4|\mathcal{N}_\epsilon|n^{-6 - \frac{\log L}{\log n}} - O(n^{-4}) \geq 1 - 4n^2Ln^{-6 - \frac{\log L}{\log n}} - O(n^{-4}) = 1 - O(n^{-4})$ . Consequently, any  $\tau \in [w_{\min}, w_{\max}]$  that obeys (18) cannot be the coordinate-wise MLE, which in turn justifies the claim (7) of Theorem 4 (which is slightly weaker than what we prove here).

**Proof of Lemma 1.** We start by evaluating the true coordinate-wise likelihood gap

$$\log \mathcal{L}(w_i, \mathbf{w}_{\setminus i}; \mathbf{y}_i) - \log \mathcal{L}(\tau, \mathbf{w}_{\setminus i}; \mathbf{y}_i) \quad (20)$$

for any fixed  $\tau \neq w_i$  independent of  $\mathbf{y}_i$ . Here,  $\mathbf{y}_i := \{y_{i,j} \mid (i,j) \in \mathcal{E}\}$  is assumed to be generated under the BTL model parameterized by  $\mathbf{w}$ , which clearly obeys

$$\mathbb{E}[y_{i,j}] = \frac{w_i}{w_i + w_j} \quad \text{and} \quad \mathbf{Var}[y_{i,j}] = \frac{1}{L} \frac{w_i w_j}{(w_i + w_j)^2}.$$

In order to quantify the average value of (20), we rewrite the likelihood function as

$$\frac{1}{L} \log \mathcal{L}(\tau, \mathbf{w}_{\setminus i}; \mathbf{y}_i) = \sum_{j:(i,j) \in \mathcal{E}} \left\{ y_{i,j} \log \left( \frac{\tau}{\tau + w_j} \right) + (1 - y_{i,j}) \log \left( \frac{w_j}{\tau + w_j} \right) \right\} \quad (21)$$

$$= \sum_{j:(i,j) \in \mathcal{E}} y_{i,j} \log \left( \frac{\tau}{w_j} \right) + \sum_{j:(i,j) \in \mathcal{E}} \log \left( \frac{w_j}{\tau + w_j} \right). \quad (22)$$

Taking expectation w.r.t.  $\mathbf{y}_i$  using the form (21) reveals that

$$\begin{aligned} \mathbb{E} \left[ \frac{1}{L} \log \mathcal{L}(w_i, \mathbf{w}_{\setminus i}; \mathbf{y}_i) - \frac{1}{L} \log \mathcal{L}(\tau, \mathbf{w}_{\setminus i}; \mathbf{y}_i) \middle| \mathcal{G} \right] &= \sum_{j:(i,j) \in \mathcal{E}} \left\{ \frac{w_i}{w_i + w_j} \log \left( \frac{\frac{w_i}{w_i + w_j}}{\frac{\tau}{\tau + w_j}} \right) + \frac{w_j}{w_i + w_j} \log \left( \frac{\frac{w_j}{w_i + w_j}}{\frac{w_j}{\tau + w_j}} \right) \right\} \\ &= \sum_{j:(i,j) \in \mathcal{E}} \text{KL} \left( \frac{w_i}{w_i + w_j} \parallel \frac{\tau}{\tau + w_j} \right), \end{aligned} \quad (23)$$

where  $\text{KL}(p||q)$  stands for the Kullback–Leibler (KL) divergence of Bernoulli ( $q$ ) from Bernoulli ( $p$ ). Using Pinsker’s inequality [1, Theorem 2.33], that is,  $\text{KL}(p||q) \geq 2(p - q)^2$ , we arrive at the following lower bound

$$\begin{aligned} \mathbb{E} \left[ \frac{1}{L} \log \mathcal{L}(w_i, \mathbf{w}_{\setminus i}; \mathbf{y}_i) - \frac{1}{L} \log \mathcal{L}(\tau, \mathbf{w}_{\setminus i}; \mathbf{y}_i) \middle| \mathcal{G} \right] &\geq 2 \sum_{j:(i,j) \in \mathcal{E}} \left( \frac{w_i}{w_i + w_j} - \frac{\tau}{\tau + w_j} \right)^2 \\ &= 2(w_i - \tau)^2 \sum_{j:(i,j) \in \mathcal{E}} \frac{w_j^2}{(w_i + w_j)^2 (\tau + w_j)^2}. \end{aligned} \quad (24)$$

That being said, the true coordinate-wise likelihood of  $w_i$  strictly dominates that of  $\tau$  in the mean sense.

However, when running Spectral MLE, we do not have access to the ground truth scores  $\mathbf{w}_{\setminus i}$ ; what we actually compute is  $\mathcal{L}(w_i, \hat{\mathbf{w}}_{\setminus i}; \mathbf{y}_i)$  (resp.  $\mathcal{L}(\tau, \hat{\mathbf{w}}_{\setminus i}; \mathbf{y}_i)$ ) rather than  $\mathcal{L}(\mathbf{w}; \mathbf{y}_i)$  (resp.  $\mathcal{L}(\tau, \mathbf{w}_{\setminus i}; \mathbf{y}_i)$ ). Fortunately, such surrogate likelihoods are sufficiently close to the true coordinate-wise likelihoods, which we will show in the rest of the proof. For brevity, we shall denote respectively the heuristic and true log-likelihood functions by

$$\begin{cases} \hat{\ell}_i(w_i) &:= \frac{1}{L} \log \mathcal{L}(w_i, \hat{\mathbf{w}}_{\setminus i}; \mathbf{y}_i), \\ \ell^*(w_i) &:= \frac{1}{L} \log \mathcal{L}(w_i, \mathbf{w}_{\setminus i}; \mathbf{y}_i), \end{cases} \quad (25)$$

whenever it is clear from context. Note that  $\hat{\mathbf{w}}_{\setminus i}$  could depend on  $\mathbf{y}_i$ .

As seen from (22), for any candidate  $\tau \in [w_{\min}, w_{\max}]$ , we can quantify the difference between  $\hat{\ell}_i(\tau)$  and  $\ell^*(\tau)$  as

$$\hat{\ell}_i(\tau) - \ell^*(\tau) = \sum_{j:(i,j) \in \mathcal{E}} y_{i,j} \log \left( \frac{w_j}{\hat{w}_j} \right) + \sum_{j:(i,j) \in \mathcal{E}} \left\{ \log \left( \frac{\hat{w}_j}{\tau + \hat{w}_j} \right) - \log \left( \frac{w_j}{\tau + w_j} \right) \right\}. \quad (26)$$

As a consequence, the gap between the true loss  $\ell^*(w_i) - \ell^*(\tau)$  and the surrogate loss  $\hat{\ell}_i(w_i) - \hat{\ell}_i(\tau)$  is given by

$$\begin{aligned} \hat{\ell}_i(w_i) - \hat{\ell}_i(\tau) - (\ell^*(w_i) - \ell^*(\tau)) &= \hat{\ell}_i(w_i) - \ell^*(w_i) - \left( \hat{\ell}_i(\tau) - \ell^*(\tau) \right) \\ &= \sum_{j:(i,j) \in \mathcal{E}} \left\{ \log \left( \frac{\hat{w}_j}{w_i + \hat{w}_j} \right) - \log \left( \frac{w_j}{w_i + w_j} \right) - \left( \log \left( \frac{\hat{w}_j}{\tau + \hat{w}_j} \right) - \log \left( \frac{w_j}{\tau + w_j} \right) \right) \right\} \end{aligned} \quad (27)$$

$$= \sum_{j:(i,j) \in \mathcal{E}} \left\{ \log \left( \frac{\tau + \hat{w}_j}{w_i + \hat{w}_j} \right) - \log \left( \frac{\tau + w_j}{w_i + w_j} \right) \right\}. \quad (28)$$

This gap relies on the function

$$g(t) := \log \left( \frac{\tau + t}{w_i + t} \right) - \log \left( \frac{\tau + w_j}{w_i + w_j} \right), \quad t \in [w_{\min}, w_{\max}],$$

which apparently obeys the following two properties: (i)  $g(w_j) = 0$ ; (ii)

$$\left| \frac{\partial g(t)}{\partial t} \right| = \left| \frac{1}{\tau + t} - \frac{1}{w_i + t} \right| = \frac{|\tau - w_i|}{(w_i + t)(\tau + t)} \leq \frac{|\tau - w_i|}{4w_{\min}^2}, \quad \forall t \in [w_{\min}, w_{\max}].$$

Taken together these two properties demonstrate that

$$|g(t)| \leq \frac{1}{4w_{\min}^2} |\tau - w_i| |t - w_j|, \quad \forall t \in [w_{\min}, w_{\max}].$$

Substitution into (28) gives

$$\begin{aligned} \left| \hat{\ell}_i(w_i) - \hat{\ell}_i(\tau) - (\ell^*(w_i) - \ell^*(\tau)) \right| &\leq \frac{1}{4w_{\min}^2} |\tau - w_i| \sum_{j:(i,j) \in \mathcal{E}} |\hat{w}_j - w_j| \\ &\leq \frac{1}{4w_{\min}^2} |\tau - w_i| \sum_{j:(i,j) \in \mathcal{E}} |\hat{w}_j^{\text{ub}} - w_j|. \end{aligned} \quad (29)$$

Notably, this is a deterministic inequality which holds for all  $\hat{w}_j$  obeying  $|\hat{w}_j - w_j| \leq |\hat{w}_j^{\text{ub}} - w_j|$  ( $1 \leq j \leq n$ ). A desired property of the upper bound (29) is that it is independent of  $\mathcal{G}$  and the data  $\mathbf{y}_i$ , due to our assumption on  $\hat{\mathbf{w}}^{\text{ub}}$ .

We now move on to develop an upper bound on (29). From our assumptions on the initial estimate, we have

$$\|\hat{\mathbf{w}} - \mathbf{w}\|^2 \leq \|\hat{\mathbf{w}}^{\text{ub}} - \mathbf{w}\|^2 \leq \delta^2 \|\mathbf{w}\|^2 \leq nw_{\max}^2 \delta^2.$$

Since  $\mathcal{G}$  and  $\hat{\mathbf{w}}^{\text{ub}}$  are statistically independent, this inequality immediately gives rise to the following two consequences:

$$\begin{aligned} \mathbb{E} \left[ \sum_{j:(i,j) \in \mathcal{E}} |\hat{w}_j^{\text{ub}} - w_j| \right] &= p_{\text{obs}} \|\hat{\mathbf{w}}^{\text{ub}} - \mathbf{w}\|_1 \leq p_{\text{obs}} \sqrt{n} \|\hat{\mathbf{w}}^{\text{ub}} - \mathbf{w}\| \\ &\leq np_{\text{obs}} w_{\max} \delta \end{aligned} \quad (30)$$

and

$$\mathbb{E} \left[ \sum_{j:(i,j) \in \mathcal{E}} |\hat{w}_j^{\text{ub}} - w_j|^2 \right] = p_{\text{obs}} \|\hat{\mathbf{w}}^{\text{ub}} - \mathbf{w}\|_2^2 \leq np_{\text{obs}} w_{\max}^2 \delta^2. \quad (31)$$

Recall our assumption that  $\max_j |\hat{w}_j^{\text{ub}} - w_j| \leq \xi w_{\max}$ . For any fixed  $\gamma \geq 3$ , if  $p_{\text{obs}} > \frac{2 \log n}{n}$ , then with probability at least  $1 - 2n^{-\gamma}$ ,

$$\begin{aligned} \sum_{j:(i,j) \in \mathcal{E}} |\hat{w}_j^{\text{ub}} - w_j| &\stackrel{(i)}{\leq} \mathbb{E} \left[ \sum_{j:(i,j) \in \mathcal{E}} |\hat{w}_j^{\text{ub}} - w_j| \right] + \sqrt{2\gamma \log n \cdot \mathbb{E} \left[ \sum_{j:(i,j) \in \mathcal{E}} |\hat{w}_j^{\text{ub}} - w_j|^2 \right]} + \frac{2\gamma}{3} \xi w_{\max} \log n \\ &\leq np_{\text{obs}} w_{\max} \delta + \sqrt{2\gamma \cdot np_{\text{obs}} \log n w_{\max} \delta} + \frac{2\gamma}{3} \xi w_{\max} \log n \\ &\stackrel{(ii)}{\leq} (1 + \sqrt{\gamma}) np_{\text{obs}} w_{\max} \delta + \frac{2\gamma}{3} \xi w_{\max} \log n \\ &\stackrel{(iii)}{\leq} \gamma np_{\text{obs}} w_{\max} \delta + \gamma \xi w_{\max} \log n, \end{aligned}$$

where (i) comes from the Bernstein inequality as given in Lemma 4, (ii) follows since  $\log n < \frac{p_{\text{obs}} n}{2}$  by assumption, and (iii) arises since  $1 + \sqrt{\gamma} \leq \gamma$  whenever  $\gamma \geq 3$ . This combined with (29) allows us to control

$$\left| \hat{\ell}_i(w_i) - \hat{\ell}_i(\tau) - (\ell^*(w_i) - \ell^*(\tau)) \right| \leq \frac{|\tau - w_i| \gamma w_{\max}}{4w_{\min}^2} (np_{\text{obs}}\delta + \xi \log n) \quad (32)$$

with high probability.

The above arguments basically reveal that  $\hat{\ell}_i(w_i) - \hat{\ell}_i(\tau)$  is reasonably close to  $\ell^*(w_i) - \ell^*(\tau)$ . Thus, to show that  $\hat{\ell}_i(w_i) - \hat{\ell}_i(\tau) > 0$ , it is sufficient to develop a lower bound on  $\ell^*(w_i) - \ell^*(\tau)$  that exceeds the gap (32). In expectation, the preceding inequality (24) gives

$$\begin{aligned} \mathbb{E}[\ell^*(w_i) - \ell^*(\tau) \mid \mathcal{G}] &\geq 2(w_i - \tau)^2 \sum_{j:(i,j) \in \mathcal{E}} \frac{w_j^2}{(w_i + w_j)^2 (\tau + w_j)^2} \\ &\geq \frac{w_{\min}^2}{8w_{\max}^4} (w_i - \tau)^2 \deg(i). \end{aligned} \quad (33)$$

Recognizing that  $y_{i,j} = \frac{1}{L} \sum_{l=1}^L y_{i,j}^{(l)}$  is a sum of independent random variables  $y_{i,j}^{(l)} \sim \text{Bernoulli}\left(\frac{w_i}{w_i + w_j}\right)$ , we can control the conditional variance as

$$\begin{aligned} \mathbf{Var}[\ell^*(w_i) - \ell^*(\tau) \mid \mathcal{G}] &\stackrel{(a)}{=} \mathbf{Var} \left[ \sum_{j:(i,j) \in \mathcal{E}} y_{i,j} \log\left(\frac{w_i}{\tau}\right) \mid \mathcal{G} \right] \\ &= \log^2\left(\frac{w_i}{\tau}\right) \sum_{j:(i,j) \in \mathcal{E}} \frac{1}{L} \frac{w_i w_j}{(w_i + w_j)^2} \stackrel{(b)}{\leq} \frac{1}{L} \frac{(w_i - \tau)^2}{\min\{w_i^2, \tau^2\}} \sum_{j:(i,j) \in \mathcal{E}} \frac{w_{\max}^2}{4w_{\min}^2} \\ &\leq \frac{w_{\max}^2}{4w_{\min}^4} \cdot \frac{1}{L} (w_i - \tau)^2 \deg(i), \end{aligned} \quad (34)$$

where (a) is an immediate consequence of (22), and (b) follows since  $\left| \log \frac{\beta}{\alpha} \right| \leq \frac{\beta - \alpha}{\alpha}$  for any  $\beta > \alpha > 0$ . Note that  $0 \leq \frac{1}{L} y_{i,j}^{(l)} \leq \frac{1}{L}$ . Making use of the Bernstein inequality, (33) and (34) suggests that: conditional on  $\mathcal{G}$ ,

$$\begin{aligned} \ell^*(w_i) - \ell^*(\tau) &\geq \mathbb{E}[\ell^*(w_i) - \ell^*(\tau) \mid \mathcal{G}] - \sqrt{2\gamma \mathbf{Var}[\ell^*(w_i) - \ell^*(\tau) \mid \mathcal{G}] \log n} - \frac{2\gamma \log n \cdot \left| \log\left(\frac{w_i}{\tau}\right) \right|}{3L} \\ &\geq \frac{w_{\min}^2}{8w_{\max}^4} (w_i - \tau)^2 \deg(i) - \frac{\sqrt{2\gamma} w_{\max} |w_i - \tau| \sqrt{\deg(i) \log n}}{2w_{\min}^2} - \frac{2\gamma |w_i - \tau| \log n}{3Lw_{\min}} \end{aligned} \quad (35)$$

holds with probability at least  $1 - 2n^{-\gamma}$ , where the last inequality follows again from the inequality  $\left| \log\left(\frac{\beta}{\alpha}\right) \right| \leq \frac{\beta - \alpha}{\alpha}$  for any  $\beta \geq \alpha > 0$ .

The above bound relies on  $\deg(i)$ , which is on the order of  $np_{\text{obs}}$  with high probability. More precisely, taking the Chernoff bound [2, Corollary 4.6] as well as the union bound reveals that: there exists some constant  $c_1 > 1$  such that if  $p_{\text{obs}} > \frac{c_1 \log n}{n}$ , then

$$\frac{4}{5} np_{\text{obs}} < \deg(i) < \frac{6}{5} np_{\text{obs}}, \quad \forall 1 \leq i \leq n \quad (36)$$

with probability at least  $\frac{2}{n^{10}}$ . This taken collectively with (35) and the assumption  $np_{\text{obs}} > 2 \log n$  implies

that

$$\begin{aligned}
\ell^*(w_i) - \ell^*(\tau) &\geq \frac{w_{\min}^2}{8w_{\max}^4} (w_i - \tau)^2 \cdot \frac{4}{5} np_{\text{obs}} - \sqrt{\frac{\gamma}{2}} \frac{w_{\max} |w_i - \tau|}{w_{\min}^2} \sqrt{\frac{6np_{\text{obs}} \log n}{5L}} - \frac{2\gamma |w_i - \tau| \log n}{3Lw_{\min}} \\
&\geq \frac{w_{\min}^2}{10w_{\max}^4} (w_i - \tau)^2 np_{\text{obs}} - \left( \sqrt{\frac{3\gamma}{5}} + \frac{2\gamma}{3} \frac{1}{\sqrt{2}} \right) \frac{w_{\max} |w_i - \tau|}{w_{\min}^2} \sqrt{\frac{np_{\text{obs}} \log n}{L}} \\
&\geq \frac{w_{\min}^2}{10w_{\max}^4} (w_i - \tau)^2 np_{\text{obs}} - \gamma \frac{w_{\max} |w_i - \tau|}{w_{\min}^2} \sqrt{\frac{np_{\text{obs}} \log n}{L}} \tag{37} \\
&\geq \frac{w_{\min}^2}{20w_{\max}^4} (w_i - \tau)^2 np_{\text{obs}} \tag{38}
\end{aligned}$$

with probability at least  $1 - 2n^{-\gamma} - 2n^{-10}$ , as long as

$$\gamma \cdot \frac{w_{\max} |w_i - \tau|}{w_{\min}^2} \sqrt{\frac{np_{\text{obs}} \log n}{L}} \leq \frac{w_{\min}^2}{20w_{\max}^4} (w_i - \tau)^2 np_{\text{obs}}$$

or, equivalently,

$$|w_i - \tau| \geq \frac{20\gamma \cdot w_{\max}^5}{w_{\min}^4} \sqrt{\frac{\log n}{np_{\text{obs}}L}}. \tag{39}$$

Finally, we are ready to control  $\hat{\ell}_i(w_i) - \hat{\ell}_i(\tau)$  from below. Putting (32) and (38) together, we see that with high probability,

$$\begin{aligned}
\hat{\ell}_i(w_i) - \hat{\ell}_i(\tau) &\geq \ell^*(w_i) - \ell^*(\tau) - \frac{|\tau - w_i| \gamma w_{\max} (np_{\text{obs}}\delta + \xi \log n)}{4w_{\min}^2} \\
&\geq \frac{w_{\min}^2}{20w_{\max}^4} (w_i - \tau)^2 np_{\text{obs}} - \frac{|\tau - w_i| \gamma w_{\max}}{4w_{\min}^2} (np_{\text{obs}}\delta + \xi \log n) \\
&> \frac{w_{\min}^2}{100w_{\max}^4} (w_i - \tau)^2 np_{\text{obs}} \tag{40} \\
&> \frac{w_{\max}^6}{100w_{\min}^6} \frac{\log n}{L}, \tag{41}
\end{aligned}$$

where (40) holds under the condition

$$|\tau - w_i| > \frac{25\gamma w_{\max}^5}{4w_{\min}^4} \left( \delta + \frac{\xi \log n}{np_{\text{obs}}} \right),$$

and (41) follows from the assumption (39). This establishes the claim (12).  $\square$

## 2.2 Proof of Theorem 3

The accuracy of top- $K$  identification is closely related to the  $\ell_\infty$  error of the score estimate. In the sequel, we shall assume that  $w_{\max} = 1$  to simplify presentation, and our goal is to demonstrate that

$$\|\mathbf{w}^{(t)} - \mathbf{w}\|_\infty \lesssim \sqrt{\frac{\log n}{np_{\text{obs}}L}} + \frac{1}{2t} \sqrt{\frac{\log n}{p_{\text{obs}}L}} \asymp \xi_t, \quad \forall t \in \mathbb{N}, \tag{42}$$

where

$$\xi_t := c_3 \left\{ \xi_{\min} + \frac{1}{2t} (\xi_{\max} - \xi_{\min}) \right\}, \quad \forall t \geq -1 \tag{43}$$

with  $\xi_{\min} = \sqrt{\frac{\log n}{np_{\text{obs}}L}}$  and  $\xi_{\max} = \sqrt{\frac{\log n}{p_{\text{obs}}L}}$ . If  $T \geq c_2 \log n$  for some sufficiently large  $c_2 > 0$ , then this gives

$$\|\mathbf{w}^{(T)} - \mathbf{w}\|_\infty \asymp \sqrt{\frac{\log n}{np_{\text{obs}}L}} = \xi_{\min}.$$

The key implication is the following: if  $w_K - w_{K-1} \geq c_1 \sqrt{\frac{\log n}{np_{\text{obs}}L}}$  for some sufficiently large  $c_1 > 0$ , then

$$w_i^{(T)} - w_j^{(T)} \geq w_i - w_j - \left| w_i^{(T)} - w_i \right| - \left| w_j^{(T)} - w_j \right| \geq w_K - w_{K+1} - 2 \left\| \mathbf{w}^{(T)} - \mathbf{w} \right\| > 0$$

for all  $1 \leq i \leq K$  and  $j \geq K+1$ , indicating that Spectral MLE will output the first  $K$  items as desired. The remaining proof then boils down to showing (42).

We start from  $t = 0$ . When the initial estimate  $\mathbf{w}^{(0)}$  is computed by Rank Centrality, the  $\ell_2$  estimation error satisfies [3]

$$\frac{\left\| \mathbf{w}^{(0)} - \mathbf{w} \right\|}{\left\| \mathbf{w} \right\|} \leq c_4 \sqrt{\frac{\log n}{np_{\text{obs}}L}} = c_4 \xi_{\min} := \delta \quad (44)$$

with high probability, where  $c_4 > 0$  is some universal constant independent of  $n, p_{\text{obs}}, L$  and  $\Delta_K$ . A by-product of this result is an upper bound

$$\left\| \mathbf{w}^{(0)} - \mathbf{w} \right\|_{\infty} \leq \left\| \mathbf{w}^{(0)} - \mathbf{w} \right\| \leq \delta \left\| \mathbf{w} \right\| \leq \delta \sqrt{n} = c_4 \sqrt{\frac{\log n}{p_{\text{obs}}L}}, \quad (45)$$

which together with the fact  $\left\| \mathbf{w}^{(0)} - \mathbf{w} \right\|_{\infty} \leq w_{\max} - w_{\min} \leq 1$  give

$$\left\| \mathbf{w}^{(0)} - \mathbf{w} \right\|_{\infty} \leq \min \left\{ c_4 \sqrt{\frac{\log n}{p_{\text{obs}}L}}, 1 \right\} = \min \{ c_4 \xi_{\max}, 1 \}. \quad (46)$$

This justifies that  $\mathbf{w}^{(0)}$  satisfies the claim (42). Notably,  $\mathbf{w}^{(0)}$  is independent of  $\mathcal{E}^{\text{iter}}$  and  $\mathbf{y}^{\text{iter}}$  and, therefore, independent of the iterative steps.

In what follows, we divide the iterative stage into two phases: (1)  $t \leq T_0$  and (2)  $t > T_0$ , where  $T_0$  is a threshold such that

$$\xi_t \geq c_{10} \xi_{\min} = c_{10} \sqrt{\frac{\log n}{np_{\text{obs}}L}}, \quad \text{iff } t \leq T_0, \quad (47)$$

for some large constant  $c_{10}$ . As is seen from the definition of  $\xi_t$ ,  $T_0 \lesssim \log n$  holds as long as  $L = O(\text{poly}(n))$ .

For the case where  $t \leq T_0$ , we proceed by induction on  $t$  w.r.t. the following hypotheses:

- $\mathcal{M}_t$ :  $\left\| \mathbf{w}^{(\text{mle})} - \mathbf{w} \right\|_{\infty} \leq \frac{1}{2} \xi_t$  holds at the  $t^{\text{th}}$  iteration (the iteration where we compute  $\mathbf{w}^{(t+1)}$ );
- $\mathcal{B}_t$ : all entries  $w_i^{(\tau)}$  of  $\mathbf{w}^{(\tau)}$  ( $\tau \leq t-1$ ) satisfying  $|w_i^{(\tau)} - w_i| \geq 1.5 \xi_t$  have been replaced by time  $t$ ;
- $\mathcal{H}_t$ : none of the entries  $w_i^{(\tau)}$  ( $\tau \leq t-1$ ) satisfying  $|w_i^{(\tau)} - w_i| \leq \frac{1}{2} \xi_t$  have been replaced by time  $t$ .

We note that  $\mathcal{B}_t$  and  $\mathcal{H}_t$  are immediate consequences of  $\mathcal{M}_t$ ,  $\mathcal{B}_{t-1}$ , and  $\mathcal{H}_{t-1}$ . First of all, with  $\mathcal{B}_{t-1}$  in mind, we only need to examine those entries  $w_i^{(\tau)}$  obeying  $|w_i^{(\tau)} - w_i| \geq 1.5 \xi_t$  that have not been replaced by time  $t-1$ . To this end, we recall that Spectral MLE replaces  $w_i^{(\tau)}$  iff  $|w_i^{(\tau)} - w_i^{\text{mle}}| > \xi_t$ . With  $\mathcal{M}_t$  in place, for each  $i$  obeying  $|w_i^{(\tau)} - w_i| \geq 1.5 \xi_t$ , one has

$$|w_i^{(\tau)} - w_i^{\text{mle}}| \geq |w_i^{(\tau)} - w_i| - |w_i^{\text{mle}} - w_i| > 1.5 \xi_t - \frac{1}{2} \xi_t = \xi_t$$

and hence it is necessarily replaced by  $w_i^{\text{mle}}$  by time  $t$ . Similarly, for any  $i$  obeying  $|w_i^{(\tau)} - w_i| \leq 0.5 \xi_t$ , one has

$$|w_i^{(\tau)} - w_i^{\text{mle}}| \leq |w_i^{(\tau)} - w_i| + |w_i^{\text{mle}} - w_i| < \frac{1}{2} \xi_t + \frac{1}{2} \xi_t = \xi_t$$

and, therefore, it cannot be replaced by time  $t$ . These establish  $\mathcal{B}_t$  and  $\mathcal{H}_t$ . As a consequence, it suffices to verify  $\mathcal{M}_t$ , which is achieved by induction.

When  $t = 0$ , applying Theorem 4 and setting  $\mathbf{w}^{\text{ub}} = \mathbf{w}^{(0)}$ , we see that

$$\left\| \mathbf{w}^{\text{mle}} - \mathbf{w} \right\|_{\infty} \leq c_7 \xi_{\min} + c_9 \frac{\log n}{np_{\text{obs}}} \xi_{\max}$$



for some universal constants  $c_7, c_9 > 0$ , where we have made use of the properties (44) and (46). When  $c_{10}$  is sufficiently large, the definition of  $T_0$  (cf. (47)) gives  $\xi_0 \gg c_7 \sqrt{\frac{\log n}{np_{\text{obs}}L}}$ ; additionally,  $c_9 \frac{\log n}{np_{\text{obs}}} \xi_{\max} \ll \xi_{\max} \leq \xi_0$  holds as long as  $\frac{\log n}{np_{\text{obs}}}$  is sufficiently small. Putting these conditions together gives

$$\|\mathbf{w}^{\text{mle}} - \mathbf{w}\|_{\infty} \leq c_7 \xi_{\min} + c_9 c_4 \frac{\log n}{np_{\text{obs}}} \xi_{\max} < \frac{1}{2} \xi_0,$$

which verifies the property  $\mathcal{M}_0$ .

We now turn to extending these inductive hypotheses to the  $t^{\text{th}}$  iteration, assuming that all of them hold up to time  $t-1$ . Taken together  $\mathcal{M}_{t-1}$  and  $\mathcal{B}_{t-1}$  immediately reveal that

$$\|\mathbf{w}^{(t)} - \mathbf{w}\|_{\infty} \leq 1.5 \xi_{t-1}. \quad (48)$$

In order to invoke Theorem 4 for the coordinate-wise MLEs, we need to construct a looser auxiliary score estimate  $\mathbf{w}^{\text{ub}}$ . With  $\mathcal{B}_{t-1}$ ,  $\mathcal{H}_{t-1}$  and (48) in mind, we propose a candidate for the  $t^{\text{th}}$  iteration as follows<sup>2</sup>

$$w_i^{\text{ub}} = \begin{cases} w_i + 1.5 \xi_{t-1}, & \text{if } |w_i^{(0)} - w_i| > \frac{1}{2} \xi_{t-1}, \\ w_i^{(0)} & \text{else.} \end{cases} \quad (49)$$

which is clearly independent of  $\mathcal{E}^{\text{iter}}$  and  $\mathbf{y}^{\text{iter}}$ . According to  $\mathcal{B}_{t-1}$  and  $\mathcal{H}_{t-1}$ , (i) none of the entries  $w_i^{(0)}$  with  $|w_i^{(0)} - w_i| \leq \frac{1}{2} \xi_{t-1}$  have been replaced so far; (ii) if an entry  $w_i^{(0)}$  has ever been replaced, then the error of the new iterate cannot exceed  $1.5 \xi_{t-1}$  (otherwise it'll be replaced by the MLE in time  $t-1$  which gives an error below  $0.5 \xi_{t-1}$ ). As a result,  $\mathbf{w}^{\text{ub}}$  clearly satisfies

$$|w_i^{(t)} - w_i| \leq |w_i^{\text{ub}} - w_i| \leq 1.5 \xi_{t-1}, \quad (50)$$

$$\text{and } \|\mathbf{w}^{(t)} - \mathbf{w}\| \leq \|\mathbf{w}^{(\text{ub})} - \mathbf{w}\| \stackrel{(i)}{\leq} \frac{1.5 \xi_{t-1}}{0.5 \xi_{t-1}} \|\mathbf{w}^{(0)} - \mathbf{w}\| \leq 3\delta \|\mathbf{w}\|. \quad (51)$$

Here, (i) arises since if  $w_i^{(0)}$  is replaced, then the error  $|w_i^{(0)} - w_i|$  is at least  $0.5 \xi_{t-1}$ , whereas the replaced pointwise error is  $1.5 \xi_{t-1}$ , which inflates the original error by no more than 3 times. With these in place, applying Theorem 4 gives

$$\|\mathbf{w}^{\text{mle}} - \mathbf{w}\|_{\infty} \leq c_8 \xi_{\min} + 1.5 c_9 \frac{\log n}{np_{\text{obs}}} \xi_{t-1},$$

which relies on the fact  $\delta \lesssim \sqrt{\frac{\log n}{np_{\text{obs}}L}}$ . Recognize that

$$\xi_t \gg c_8 \xi_{\min} \quad \text{and} \quad 1.5 c_9 \frac{\log n}{np_{\text{obs}}} \xi_{t-1} \ll \xi_t$$

hold in the regime where  $t \leq T_0$  and  $\frac{\log n}{np_{\text{obs}}} \ll 1$ , which taken together give

$$\|\mathbf{w}^{\text{mle}} - \mathbf{w}\|_{\infty} \leq \frac{1}{2} \xi_t$$

as claimed in  $\mathcal{M}_t$ . Having verified these inductive hypotheses, we see from the above argument that the worst case  $\ell_{\infty}$  error bound at the  $t^{\text{th}}$  iteration is at most  $1.5 \xi_t$ , which in turn leads to the claim (42) for any  $t \leq T_0$ .

---

<sup>2</sup>Careful readers will note that when  $|w_i^{(0)} - w_i| \geq \frac{1}{2} \Delta_{t-1}$ , the resulting  $w_i^{\text{ub}}$  might exceed the range  $[w_{\min}, w_{\max}]$ . This can be easily addressed if we do the following: (1) change  $w_i^{\text{ub}}$  to  $w_i - 1.5 \Delta_{t-1}$  instead if  $w_i - 1.5 \Delta_{t-1} \in [w_{\min}, w_{\max}]$ ; (2) if it is still infeasible, set  $w_i^{\text{ub}}$  to be  $w_{\max}$  if  $|w_i - w_{\max}| > |w_i - w_{\min}|$  and  $w_{\min}$  otherwise. For simplicity of presentation, however, we omit these boundary situations and assume  $w_i + 1.5 \Delta_{t-1} \leq w_{\max}$  throughout, which will not change the results anyway.

Starting from  $t = T_0 + 1$ , we fix the auxiliary score as follows

$$w_i^{\text{ub}} = \begin{cases} w_i + 1.5\xi_{T_0}, & \text{if } |w_i^{(0)} - w_i| > \frac{1}{2}\xi_\infty, \\ w_i^{(0)} & \text{else,} \end{cases} \quad (52)$$

where we recall that  $\xi_\infty = c_3\xi_{\min}$  and  $\xi_{T_0} = c_{10}\xi_{\min}$ . This apparently satisfies

$$|w_i^{(t)} - w_i| \leq |w_i^{\text{ub}} - w_i| \leq 1.5\xi_{T_0}$$

for  $t = T_0 + 1$ , due to the preceding analysis for  $t \leq T_0$ . Moreover, the number of indices that satisfy  $|w_i^{(0)} - w_i| > \frac{1}{2}\xi_\infty$ , denoted by  $k$ , obeys

$$k \cdot \left(\frac{1}{2}\xi_\infty\right)^2 \leq \|\mathbf{w} - \mathbf{w}^{(0)}\|^2 \leq \delta^2\|\mathbf{w}\|^2 \iff k \leq \frac{4\delta^2\|\mathbf{w}\|^2}{\xi_\infty^2},$$

which further gives

$$\begin{aligned} \|\mathbf{w}^{\text{ub}} - \mathbf{w}\|^2 &\leq \|\mathbf{w}^{(0)} - \mathbf{w}\|^2 + \sum_{i: |w_i^{(0)} - w_i| > \frac{1}{2}\xi_\infty} (1.5\xi_{T_0})^2 \leq \delta^2\|\mathbf{w}\|^2 + 2.25k\xi_{T_0}^2 \\ &\leq \delta^2\|\mathbf{w}\|^2 \left(1 + \frac{9\xi_{T_0}^2}{\xi_\infty^2}\right). \end{aligned}$$

If we pick  $\frac{c_{10}}{c_3} = \frac{\xi_{T_0}}{\xi_\infty} \leq \sqrt{2}$ , then the above inequality gives rise to

$$\|\mathbf{w}^{\text{ub}} - \mathbf{w}\| \leq \sqrt{19}\delta\|\mathbf{w}\|.$$

Apply Theorem 4 to deduce

$$\|\mathbf{w}^{\text{mle}} - \mathbf{w}\|_\infty \lesssim \delta + \frac{\log n}{np_{\text{obs}}}\xi_{T_0} + \sqrt{\frac{\log n}{np_{\text{obs}}L}} \asymp \sqrt{\frac{\log n}{np_{\text{obs}}L}} \ll \frac{1}{2}\xi_\infty,$$

as long as  $\frac{\log n}{p_{\text{obs}}n}$  is small and  $c_{10}, c_3$  are sufficiently large.

The main point of the above calculation is that: for any entry  $w_i^{(0)}$  satisfying  $|w_i^{(0)} - w_i| < \frac{1}{2}\xi_\infty$ , one must have

$$\left|w_i^{(0)} - w_i^{\text{mle}}\right| \leq \left|w_i^{(0)} - w_i\right| + \left|w_i^{(\text{mle})} - w_i\right| < \xi_\infty < \xi_t,$$

and hence it will never be replaced. As a result, the auxiliary score (52) remains valid for all iterations that follow. Putting the above arguments together we obtain

$$\|\mathbf{w}^{(t)} - \mathbf{w}\|_\infty \leq \frac{1}{2}\xi_\infty \asymp \sqrt{\frac{\log n}{np_{\text{obs}}L}}, \quad t > T_0.$$

This establishes the claim (42) for  $t > T_0$ , and in turn finishes the proof of the theorem.

### 3 Minimax Lower Bound

This section establishes the minimax lower limit given in Theorem 2. To bound the minimax probability of error, we proceed by constructing a finite set of hypotheses, followed by an analysis based on classical Fano-type argument. For notational simplicity, each hypothesis is represented by a permutation  $\sigma$  over  $[n]$ , and we denote by  $\sigma(i)$  and  $\sigma([K])$  the index of the  $i^{\text{th}}$  ranked item and the index set of all top- $K$  items, respectively.

We now single out a set of hypotheses and some prior to be imposed on them. Suppose that the values of  $\mathbf{w}$  are fixed up to permutation in such a way that

$$w_{\sigma(i)} = \begin{cases} w_K, & 1 \leq i \leq K, \\ w_{K+1}, & K < i \leq n, \end{cases}$$

where we abuse the notation  $w_K, w_{K+1}$  to represent any two values satisfying

$$\frac{w_K - w_{K+1}}{w_{\max}} = \Delta_K > 0.$$

Below we suppose that the ranking scheme is informed of the values  $w_K, w_{K+1}$ , which only makes the ranking task easier. In addition, we impose a uniform prior over a collection  $\mathcal{M}$  of  $M := \max\{K, n - K\} + 1$  hypotheses regarding the permutation: if  $K < n/2$ , then

$$\mathbb{P}\{\sigma([K]) = \mathcal{S}\} = \frac{1}{M}, \text{ if } \mathcal{S} = \{2, \dots, K\} \cup \{i\}, \quad (i = 1, K + 1, \dots, n); \quad (53)$$

if  $K \geq n/2$ , then

$$\mathbb{P}\{\sigma([K]) = \mathcal{S}\} = \frac{1}{M}, \text{ if } \mathcal{S} = \{1, \dots, K + 1\} \setminus \{i\}, \quad (i = 1, \dots, K + 1). \quad (54)$$

In words, each alternative hypothesis is generated by swapping two indices of the hypothesis obeying  $\sigma([K]) = [K]$ . Denoting by  $P_{e,M}$  the average probability of error with respect to the prior we construct, one can easily verify that the minimax probability of error is at least  $P_{e,M}$ .

This Bayesian probability of error will be bounded using classical Fano-type bounds. To accommodate partial observation, we introduce an erased version of  $\mathbf{y}_{i,j} := (y_{i,j}^{(1)}, \dots, y_{i,j}^{(L)})$  such that

$$\mathbf{z}_{i,j} = \begin{cases} \mathbf{y}_{i,j}, & \text{with probability } p_{\text{obs}}, \\ \text{erasure,} & \text{else,} \end{cases}$$

and set  $\mathbf{Z} := \{\mathbf{z}_{i,j}\}_{1 \leq i \leq j \leq n}$ . With a slight abuse of notation, we denote by  $\sigma$  and  $\hat{\sigma}$  the ground truth permutation and the output of any ranking procedure, respectively. Making use of (53) and (54) gives

$$\begin{aligned} \log M &= H(\sigma) = I(\sigma; \hat{\sigma}) + H(\sigma | \hat{\sigma}) \\ &\stackrel{(a)}{\leq} I(\sigma; \mathbf{Z}) + 1 + P_{e,M} \log M \\ &\stackrel{(b)}{\leq} \frac{1}{M^2} \sum_{\sigma_1, \sigma_2 \in \mathcal{M}} \text{KL}(\mathbb{P}_{\mathbf{Z}|\sigma=\sigma_1} \| \mathbb{P}_{\mathbf{Z}|\sigma=\sigma_2}) + 1 + P_{e,M} \log M \\ &\stackrel{(c)}{=} \frac{1}{M^2} \sum_{\sigma_1, \sigma_2 \in \mathcal{M}} \sum_{i \neq j} \text{KL}(\mathbb{P}_{\mathbf{z}_{i,j}|\sigma=\sigma_1} \| \mathbb{P}_{\mathbf{z}_{i,j}|\sigma=\sigma_2}) + 1 + P_{e,M} \log M \\ &= \frac{p_{\text{obs}}}{M^2} \sum_{\sigma_1, \sigma_2 \in \mathcal{M}} \sum_{i \neq j} \text{KL}(\mathbb{P}_{\mathbf{y}_{i,j}|\sigma=\sigma_1} \| \mathbb{P}_{\mathbf{y}_{i,j}|\sigma=\sigma_2}) + 1 + P_{e,M} \log M \\ &\stackrel{(d)}{=} \frac{p_{\text{obs}} L}{M^2} \sum_{\sigma_1, \sigma_2 \in \mathcal{M}} \sum_{i \neq j} \text{KL}(\mathbb{P}_{y_{i,j}^{(1)}|\sigma=\sigma_1} \| \mathbb{P}_{y_{i,j}^{(1)}|\sigma=\sigma_2}) + 1 + P_{e,M} \log M \\ &\stackrel{(e)}{\leq} \frac{2w_{\max}^4}{w_{\min}^4} n p_{\text{obs}} L \Delta_K^2 + 1 + P_{e,M} \log M, \end{aligned}$$

where  $H(X)$ ,  $I(X; Y)$ , and  $\text{KL}(P \| Q)$  denote the entropy, mutual information, and Kullback–Leibler (KL) divergence, respectively. Here, (a) results from the data processing inequality and Fano's inequality [4]; (b) arises from Lemma 2 (see below); (c) follows from the independence assumption of the  $\mathbf{z}_{i,j}$ 's; (d) is a

consequence of the fact that  $y_{i,j}^{(\ell)}$  ( $1 \leq l \leq L$ ) are i.i.d.; and (e) follows from Lemma 3 (see below). This immediately yields

$$P_{e,M} \geq \frac{\log M - \frac{2w_{\max}^4}{w_{\min}^4} np_{\text{obs}} L \Delta_K^2 - 1}{\log M}.$$

Consequently, one would have  $P_e \geq P_{e,M} \geq \epsilon$  if

$$\frac{2w_{\max}^4}{w_{\min}^4} np_{\text{obs}} L \Delta_K^2 \leq (1 - \epsilon) \log M - 1.$$

Since  $|\mathcal{M}| = M \geq \frac{n}{2}$ , the above condition is necessarily satisfied when

$$\frac{2w_{\max}^4}{w_{\min}^4} np_{\text{obs}} L \Delta_K^2 \leq (1 - \epsilon) \log n - 2 \iff L \leq \frac{w_{\min}^4}{2w_{\max}^4} \cdot \frac{(1 - \epsilon) \log n - 2}{np_{\text{obs}} \Delta_K^2},$$

which finishes the proof.

**Lemma 2.** *Under the prior (53) and (54), one has*

$$I(\sigma; \mathbf{z}) \leq \frac{1}{M^2} \sum_{\sigma_1, \sigma_2 \in \mathcal{M}} \text{KL}(\mathbb{P}_{\mathbf{Z}|\sigma=\sigma_1} \parallel \mathbb{P}_{\mathbf{Z}|\sigma=\sigma_2}). \quad (55)$$

*Proof.* It follows from the definition of mutual information that

$$\begin{aligned} I(\sigma; \mathbf{z}) &= \sum_{\sigma_1 \in \mathcal{M}} \sum_{\mathbf{z}} \mathbb{P}(\sigma = \sigma_1, \mathbf{Z} = \mathbf{z}) \log \frac{\mathbb{P}(\mathbf{Z} = \mathbf{z} \mid \sigma = \sigma_1)}{\mathbb{P}(\mathbf{Z} = \mathbf{z})} \\ &= \frac{1}{M} \sum_{\sigma_1 \in \mathcal{M}} \sum_{\mathbf{z}} \mathbb{P}(\mathbf{Z} = \mathbf{z} \mid \sigma = \sigma_1) \log \left\{ \frac{\mathbb{P}(\mathbf{Z} = \mathbf{z} \mid \sigma = \sigma_1)}{\frac{1}{M} \sum_{\sigma_2 \in \mathcal{M}} \mathbb{P}(\mathbf{Z} = \mathbf{z} \mid \sigma = \sigma_2)} \right\} \\ &\leq \frac{1}{M} \sum_{\sigma_1 \in \mathcal{M}} \sum_{\mathbf{z}} \mathbb{P}(\mathbf{Z} = \mathbf{z} \mid \sigma = \sigma_1) \left\{ \frac{1}{M} \sum_{\sigma_2 \in \mathcal{M}} \log \frac{\mathbb{P}(\mathbf{Z} = \mathbf{z} \mid \sigma = \sigma_1)}{\mathbb{P}(\mathbf{Z} = \mathbf{z} \mid \sigma = \sigma_2)} \right\} \\ &= \frac{1}{M^2} \sum_{\sigma_1, \sigma_2 \in \mathcal{M}} \text{KL}(\mathbb{P}_{\mathbf{Z}|\sigma=\sigma_1} \parallel \mathbb{P}_{\mathbf{Z}|\sigma=\sigma_2}), \end{aligned}$$

where the inequality is due to Jensen's inequality. □

**Lemma 3.** *If  $w_K, w_{K+1} \in [w_{\min}, w_{\max}]$ , then for any  $\sigma_1, \sigma_2 \in \mathcal{M}$ :*

$$\sum_{i \neq j} \text{KL}(\mathbb{P}_{y_{i,j}^{(1)}|\sigma=\sigma_1} \parallel \mathbb{P}_{y_{i,j}^{(1)}|\sigma=\sigma_2}) \leq \frac{2w_{\max}^4}{w_{\min}^4} n \Delta_K^2. \quad (56)$$

*Proof.* To start with, for any two measures  $P \sim \text{Bernoulli}(p)$  and  $Q \sim \text{Bernoulli}(q)$ , one has [5, Eqn. (7)]

$$\text{KL}(P \parallel Q) \leq \chi^2(P \parallel Q) = \frac{(p-q)^2}{q} + \frac{(p-q)^2}{1-q} = \frac{(p-q)^2}{q(1-q)}. \quad (57)$$

where  $\chi^2(P \parallel Q)$  denotes the  $\chi^2$  divergence.

Recall that given  $\sigma = \sigma_1$  (resp.  $\sigma = \sigma_2$ ),  $y_{i,j}^{(1)}$  is Bernoulli distributed with mean  $r_1 := \frac{w_{\sigma_1(i)}}{w_{\sigma_1(i)} + w_{\sigma_1(j)}}$  (resp.  $r_2 := \frac{w_{\sigma_2(i)}}{w_{\sigma_2(i)} + w_{\sigma_2(j)}}$ ). If we set  $\delta = r_1 - r_2$ , then (57) yields

$$\text{KL}(\mathbb{P}_{y_{i,j}^{(1)}|\sigma=\sigma_1} \parallel \mathbb{P}_{y_{i,j}^{(1)}|\sigma=\sigma_2}) \leq \frac{\delta^2}{r_2(1-r_2)} \leq \frac{4w_{\max}^2}{w_{\min}^2} \delta^2,$$

where the last inequality follows since

$$r_2(1-r_2) = \frac{w_{\sigma_2(i)}w_{\sigma_2(j)}}{(w_{\sigma_2(i)}+w_{\sigma_2(j)})^2} \geq \frac{w_{\min}^2}{4w_{\max}^2}.$$

By construction, conditional on any hypotheses  $\sigma_1, \sigma_2 \in \mathcal{M}$ , the resulting  $\mathbf{y}_{i,j}$  are different over at most  $2n$  locations. For each of these  $O(n)$  locations, our construction of  $\mathcal{M}$  ensures that

$$|\delta| = |r_2 - r_1| \leq \frac{w_K}{w_K + w_{K+1}} - \frac{w_{K+1}}{w_K + w_{K+1}} = \frac{w_K - w_{K+1}}{w_K + w_{K+1}} \leq \frac{w_{\max}}{2w_{\min}} \Delta_K.$$

As a result, the total contribution is bounded above by

$$\sum_{i \neq j} \text{KL} \left( \mathbb{P}_{\mathbf{y}_{i,j}^{(1)} | \sigma = \sigma_1} \parallel \mathbb{P}_{\mathbf{y}_{i,j}^{(1)} | \sigma = \sigma_2} \right) \leq 2n \cdot \left( \max_{i,j} \delta^2 \right) \frac{4w_{\max}^2}{w_{\min}^2} \leq \frac{2w_{\max}^4}{w_{\min}^4} n \Delta_K^2.$$

□

## A Bernstein Inequality

Our analysis relies on the Bernstein inequality. To simplify presentation, we state below a user-friendly version of Bernstein inequality.

**Lemma 4.** *Consider  $n$  independent random variables  $z_l$  ( $1 \leq l \leq n$ ), each satisfying  $|z_l| \leq B$ . Then there exists a universal constant  $c_0 > 0$  such that for any  $a \geq 2$ ,*

$$\left| \sum_{l=1}^n z_l - \mathbb{E} \left[ \sum_{l=1}^n z_l \right] \right| \leq \sqrt{2a \log n \sum_{l=1}^n \mathbb{E}[z_l^2]} + \frac{2a}{3} B \log n \quad (58)$$

with probability at least  $1 - \frac{2}{n^a}$ .

This is an immediate consequence of the well-known Bernstein inequality

$$\mathbb{P} \left\{ \left| \sum_{l=1}^n z_l - \mathbb{E} \left[ \sum_{l=1}^n z_l \right] \right| > t \right\} \leq 2 \exp \left( - \frac{\frac{1}{2} t^2}{\sum_{l=1}^n \mathbb{E}[z_l^2] + \frac{1}{3} B t} \right). \quad (59)$$

## References

- [1] R. W. Yeung, *Information theory and network coding*. Springer, 2008. 2.1
- [2] M. Mitzenmacher and E. Upfal, *Probability and computing: Randomized algorithms and probabilistic analysis*. Cambridge University Press, 2005. 2.1
- [3] S. Negahban, S. Oh, and D. Shah, “Rank centrality: Ranking from pair-wise comparisons,” 2012. [Online]. Available: <http://arxiv.org/abs/1209.1688> 2.2
- [4] T. M. Cover and J. A. Thomas, *Elements of information theory*. John Wiley & Sons, 2012. 3
- [5] T. van Erven and P. Harremoës, “Renyi divergence and Kullback-Leibler divergence,” *IEEE Transactions on Information Theory*, vol. 60, no. 7, pp. 3797–3820, July 2014. 3
